# Supplementary material for: Warming enhances old organic carbon decomposition through altering functional microbial communities
Source: PubMed Central journal article supplement — ISME J. 2017 Apr 21;11(8):1825–35. doi: 10.1038/ismej.2017.48 (PMC5520036; doi:10.1038/ismej.2017.48), 2017-04-21
Supplement: ismej201748x1.pdf [file ismej201748x1.pdf]

## Appendix S1: detailed descriptions of methods

### Section 1: the Oklahoma long-term field warming experiment

Site description. We initiated a long-term field experiment to investigate the responses of a tall grass prairie ecosystem to warming in November, 1999 (Supplementary Fig. 1a). The experimental site is located at the Kessler's Farm Field Laboratory in McClain County (34° 58' 54" N, 97° 31' 14" W), 40 km from the Norman campus of the University of Oklahoma, OK, USA. Annual mean temperature is 16.3°C and annual mean precipitation is 914 mm. Before the start of this experiment, the field had not been grazed for at least 40 years. The plant community composition is dominated by C<sub>4</sub> grasses (*Andropogon gerardii*, *Panicum virgatum*, and *Sorghastrum nutans*) and C<sub>3</sub> forbs (*Ambrosia psilostachya*, *Solidago rigida*, *Solidago nemoralis*, and *hemiachyris dracunculoides*). The soil is part of the Nash-Lucien complex, characterized by a high water holding capacity and a deep and moderately penetrable root zone with a neutral pH (Zhou et al 2007).

Experimental design. The field experiment was a paired factorial design with warming as the main factor (n = 6) nested by the clipping factor. Each main plot was 2 m × 2 m in size (Supplementary Figs. 1a and 1b). In each pair of main treatments, one plot has been warmed continuously since November, 1999, to the present, and the other has been treated as control with ambient temperature. In each warmed plot, a single 165 cm × 15 cm infrared heater (Kalglo Electronics Inc., Bethlehem, PA, USA), suspended 1.5 m above the ground, was used to elevate temperature in each warmed plot. In each control plot, meanwhile, a 'dummy' heater with the same shape and size as the infrared heater was also suspended

1 1.5 m high to simulate the shading effects of the heater of warmed plots. Within each pair, the control  
2 plot was at least 5 m away from the warming one to avoid the heating effects. The distance between  
3 different paired plots ranged from 20 to 60 m. Each plot was split into four 1 m × 1 m subplots. Plants  
4 within two diagonal subplots were clipped at a height of 10 cm above the ground once a year to mimic  
5 hay harvesting or biofuel feedstock production, while the other two diagonal subplots remained  
6 unclipped (Supplementary Fig. 1b). During the course of experiment, daily mean air temperature, daily  
7 mean soil temperature, and soil moisture have been continuously monitored (Luo et al 2001, Xu et al  
8 2015, Zhou et al 2012, Zhou et al 2007). In our system, experimental warming significantly enhanced  
9 the daily mean air temperature by 1.27 °C and daily mean soil temperature by 1.71 °C under unclipping  
10 and by 2.18 °C under clipping over the experimental duration. The heating effect of infrared heaters on  
11 soil temperature has been shown to reach soil depth as deep as 50 cm in the literature (Rui et al 2011,  
12 Xue et al 2015, Zhang et al 2015) (also see Supplementary Data Sets).

13 Deep soil collars. We installed a deep soil collar (a PVC tube with 10 cm in diameter × 70 cm in depth)  
14 in an unclipped subplot of each main treatment plot in October, 2001. The schematic map of the deep  
15 collar is shown in the Supplementary Figure 1c. The purpose of the installation of the deep collar was to  
16 cut off the existing roots and to exclude the influences of mycorrhizae, root exudation and the growth of  
17 new roots on soil C decomposition. In the winter of 2015, we also measured soil temperature adjacent to  
18 the deep collar at both 5 cm and 25 cm soil depths using a LI-COR 8100 gas flux system coupled with a  
19 thermo-probe sensor. Soil temperature had been monitored from 9:00 am to 1:00 pm each day. Warming  
20 increased daily soil temperature on average by 3.0 °C and 2.8 °C, respectively, at 5 cm and 25 cm soil

1 depths, suggesting the magnitude of heating effect on soil temperature was comparable across the soil  
2 profile. We also monitored the CO<sub>2</sub> efflux from the deep collar twice a month from October, 2001 to the  
3 present (Xu et al 2015, Zhou et al 2007).

4 Soil sampling. We used a 5-cm diameter soil corer to take soil samples from the soil layer of 0-25 cm in  
5 the deep collar by the end of 11<sup>th</sup> year growth season. Soil samples were split into two soil layers (0-20  
6 and 20-25 cm) and then sealed in plastic bags, stored in a cooler with dry ice and transported to the  
7 laboratory. In the laboratory, field moist soil of the 20-25 cm layer was mixed thoroughly and passed  
8 through a 4-mm sieve. Subsamples (~ 10 g) were then taken immediately, frozen and stored at -80 °C  
9 for the DNA extraction and the rest of soils were stored at 4 °C for the laboratory incubation and other  
10 analyses. A 5-g subsample was oven-dried at 65 °C for 48 h and weighed for the determination of the  
11 water content. Soil pH was measured in water using a ratio of 5 g soil to 5 ml DI water. Warming had no  
12 impact on soil pH (Warming plots:  $7.34 \pm 0.25$  (s.e.m.); control plots:  $7.33 \pm 0.25$  (s.e.m.)).

13 Soil organic carbon and radiocarbon analyses. Subsamples (10 g) from both top- and sub-soil layers  
14 were pretreated with acid (0.1 M HCl) for 8 hours to eliminate carbonate (Jenkinson et al 2008), then  
15 were oven-dried at 60 °C and ground into powder. The soil C concentrations were determined with a  
16 CHN elemental analyzer (Carla Erba and model 2400, Perkin Elmer Co., Norwalk, CT, USA). The bulk  
17 density of soil samples was determined and used to calculate the soil organic C stocks of the 0-25 cm  
18 soil profile. Subsamples from the subsoil layer of 20-25 cm were also used to determine the  $\Delta^{14}\text{C}$  age of  
19 soil organic matter (SOM). The soils for radiocarbon dating were analyzed at the University of Arizona

1 NSF-AMS facility (Donahue 1995). The radiocarbon data were shown as conventional years Before  
2 Present (BP, relative to 1950).

### 3 **Section 2: carbon pool partitioning**

4 Theory. The  $^{14}\text{C}$  nucleus is not stable, decaying with a half-life of 5730 years. The remaining amount ( $N$ )  
5 of  $^{14}\text{C}$  in a sample after a certain period of decaying can be described by:

$$6 \quad N = N_0 \left(\frac{1}{2}\right)^{\frac{t}{5730}} \quad (1)$$

7 where  $N_0$  is the initial amount of  $^{14}\text{C}$ , and  $t$  is the time of decaying (years). If organic matter in a soil  
8 sample is homogeneous at steady state, each C atom would have the same probability of leaving (Torn et  
9 al 2009). In reality, however, SOM in the bulk soil is enormously heterogeneous. Even so, it is plausible  
10 to divide SOM of a soil sample into several C age pools with each pool assuming to be homogeneous  
11 (Knorr et al 2005, Torn et al 2009). As such, the total amount of  $^{14}\text{C}$  in a  $n$ -pool C model can be  
12 described by:

$$13 \quad N_{Total} = \sum_{i=1}^n N_i w_i \quad (2)$$

14 where  $N_i$  is the  $^{14}\text{C}$  content of the  $i^{\text{th}}$  C age pool,  $w_i$  is the proportion of the  $i^{\text{th}}$  C age pool. We then used  
15 the Arrhenius equation (Arrhenius 1889, Davidson and Janssens 2006) to estimate the warming effects  
16 on the dynamics of each C pool. The Arrhenius equation of the  $i^{\text{th}}$  C age pool can be expressed as

$$v_i = Ae^{-\frac{E_i}{RT}} \quad (3)$$

where  $v_i$  is the reaction rate of the  $i^{\text{th}}$  pool,  $E_i$  is the activation energy of the SOM of the  $i^{\text{th}}$  pool,  $R$  is the gas constant,  $T$  is the temperature in Kelvin, and  $A$  is the pre-exponential factor which equals to the theoretical decomposition rate of a C pool when the activation energy is zero. We can then use the Arrhenius equation to compare the changes in the reaction rate of a given C pool under two different temperatures ( $T_1$  and  $T_2$ ):

$$\frac{v_i(T_1)}{v_i(T_2)} = e^{\frac{E_i}{R}(\frac{1}{T_2} - \frac{1}{T_1})} \quad (4)$$

Because decomposition is a repertoire of enzymatic reactions, the decomposition rate of a single C pool can be also described by the Michaelis–Menten equation

$$\frac{dc}{dt} = -\frac{V_{\max,i} \times c}{k_{m,i} + c} \quad (5)$$

where  $V_{\max,i}$  is the maximum reaction rate of the  $i^{\text{th}}$  C age pool at a given temperature,  $c$  is the substrate concentration, and  $k_{m,i}$  is the half-saturated constant which equals to the substrate concentration at half of the maximum reaction rate. To introduce the effect of temperature into the Michaelis-Menten kinetics (Davidson et al 2012), we substituted equation (3) into equation (5) to obtain a temperature-dependent equation as follows:

$$\frac{dc}{dt} = -\frac{A_{v \max,i} e^{-\frac{E_i}{RT}} \times c}{k_{m,i} + c} \quad (6)$$

1 By integrating equation (6), we obtained that the relationship between the remaining SOM content and  
 2 decomposition time  $t$  at a given temperature  $T$  in the  $i^{\text{th}}$  homogeneous C pool meets the following  
 3 equation:

$$4 \quad k_{m,i} \ln \frac{c_0}{c_{t,i}} + c_0 - c_{t,i} = A_{v \max,i} e^{-\frac{E_i}{RT} t} \quad (7)$$

5 where  $c_0$  is the initial SOM content of the  $i^{\text{th}}$  C pool,  $c_{t,i}$  is the remaining SOM content after  
 6 decomposition time  $t$  in the  $i^{\text{th}}$  C pool. Although elevated temperature may also increase  $k_{m,i}$  for most  
 7 enzymes (Davidson and Janssens 2006), the relative changes in  $k_{m,i}$  can be negligible for a given C pool  
 8 under the current warming scenarios (Davidson et al 2012). Considering a stable  $k_{m,i}$  in decomposition of  
 9 a given homogeneous C pool, we rearranged equation (7) by substituting the ' $c_{t,i}$ ' into ' $c_0 - c_{\text{consumed}, T, i}$ '  
 10 to obtain:

$$11 \quad k_m \ln \left( \frac{c_0}{c_0 - c_{\text{consumed}, T, i}} \right) + c_{\text{consumed}, T, i} = A_{v \max} e^{-\frac{E_i}{RT} t} \quad (8)$$

12 where  $c_{\text{consumed}, T, i}$  is the consumed SOM content after decomposition time  $t$  at a given temperature  $T$  in  
 13 the  $i^{\text{th}}$  C pool. Let's define a function  $f(x)$  as follows:

$$14 \quad f(x) = -\frac{1}{c_0} \frac{\ln(1-x)}{x} \quad (9)$$

15 By taking a derivative of  $f(x)$ , we can see  $f(x)$  increases with  $x$  ( $0 < x < 1$ ). Suppose  $x = \frac{c_{\text{consumed}, T, i}}{c_0}$ , and

16 when  $T_1 > T_2$ , as we have  $c_{\text{consumed}, T_1, i} \geq c_{\text{consumed}, T_2, i}$ , we can obtain:

1 
$$f\left(\frac{C_{consumed,T_1,i}}{C_0}\right) \geq f\left(\frac{C_{consumed,T_2,i}}{C_0}\right) \quad (10)$$

2 Equation (10) can also be expressed by:

3 
$$\frac{\ln\left(\frac{C_0}{C_0 - C_{consumed,T_1,i}}\right)}{\ln\left(\frac{C_0}{C_0 - C_{consumed,T_2,i}}\right)} \geq \frac{C_{consumed,T_1,i}}{C_{consumed,T_2,i}} \quad (11)$$

4 We then rearranged equation (8), and inserted it into inequality (11) to obtain a new inequality as  
 5 follows, which shall be used to infer the warming effects on the decomposition of different C pools in  
 6 soil samples in our study.

7 
$$\frac{C_{consumed,T_1,i}}{C_{consumed,T_2,i}} \leq e^{\frac{E_i}{R}\left(\frac{1}{T_2} - \frac{1}{T_1}\right)} \quad (12)$$

8 Parameterization. SOM constitutes numerous C pools with a continuum of ages, and each C pool may  
 9 be deemed homogeneous at steady state. Previous studies have often considered SOM one-, or two- or  
 10 three-C pools (Davidson and Janssens 2006, Knorr et al 2005, Schaedel et al 2013). Knorr *et al* found  
 11 that the three-pool C model was sufficient and a better choice to interpret the data from the soil warming  
 12 experiment in comparison with one- and two-pool C models (Knorr et al 2005). In our current study, we  
 13 had precluded new C inputs into deep collars for nearly 10 years, and thus, there were rarely SOM with  
 14 the age < 9 yr remaining in deep collars at the sampling time. Thus, we did not consider a C pool with  
 15 the average age of less than 10 years (that is annual age C pool). We then restricted equation (2) to a  
 16 four-pool C model in which we assumed the average ages of each C pool to be 50 yr, 500 yr, 5000 yr

1 and  $\geq 50000$  yr, respectively. These four C pools were used to refer to the pools of decadal, centennial,  
2 millennial and ‘immortal’ age SOM in soil. The decadal age C pool often constitutes the largest C pool,  
3 followed by centennial, millennia and immortal C pools, in soil (Davidson and Janssens 2006, Rumpel  
4 et al 2002), which shall be used to set a range of the proportions of each C age pools in our model. We  
5 also assumed that current warming scenarios did not affect the decomposition of the oldest C pool.

6 We used equation (1) to estimate the relative content of  $^{14}\text{C}$  of the centennial, millennia and even older  
7 carbon pool in comparison with  $N_0$ . Atmospheric nuclear weapon testing almost doubled the amount of  
8  $^{14}\text{C}$  in the atmosphere in Northern Hemisphere in the 1960s (Currie 2004, Levin et al 1994), leading to  
9 the substantial amount of bomb radiocarbon incorporated into the decadal C pool. Because the decayed  
10 bomb radiocarbon during the 50 years was negligible compared to the total  $^{14}\text{C}$ , we assumed that the  
11 relative amount of  $^{14}\text{C}$  in the decadal C pool was 1.5 times of  $N_0$ . The activation energy for each C pool  
12 was estimated based on Knorr’s model (Knorr et al 2005), with the activation energy for decadal,  
13 centennial and millennia C pools being 61.6, 67.1 and 72.7  $\text{kJ mol}^{-1}$ , respectively. Notice that Knorr’s  
14 model (Knorr et al 2005) used the turnover time instead of the average age to describe each C pool. For  
15 a homogeneous SOM pool at steady state as assumed in our model, the turnover time and average age of  
16 a SOM pool could be assumed equal (Torn et al 2009), so it is possible to estimate the activation energy  
17 of each age pool according to Knorr’s model (Knorr et al 2005). We set the range of the initial total C  
18 content according to measurements of the current work and our previous published work (Niu et al 2010,  
19 Schaedel et al 2013). We then combined equation (2) and inequality (12) to estimate the proportions of  
20 each C pool as well as the consumed C in each pool under warming and control, and then calculated the



1 possible range of the ratio of consumed carbon in different temperature conditions (see results in the  
2 Supplementary Table 2). The four-C age pool model can be also reduced into two- or three-C age pool  
3 models. In addition, the centennial C age pool can also be set as the largest pool. Altering these did not  
4 change the results that warming increased decomposition of decadal to millennial SOM within deep  
5 collars in our Oklahoma soil plots. All calculations were performed using the MATLAB software (The  
6 MathWorks, Inc. USA), and the matlab codes are available upon request.

### 7 **Section 3: the meta-analysis study**

8 Data extraction. We conducted a meta-analysis study to examine the effects of warming on SOM  
9 decomposition across the soil profile in the field. We used Web of Science for a thorough search of  
10 relevant peer-reviewed articles published before November 2015. The search terms included either  
11 “warming” or “elevated temperature”, and “soil”, and “carbon” or “C” or “soil organic matter”. We then  
12 selected published studies (He et al 2012, Heng et al 2011, Li et al 2010, Li et al 2011, Pan et al 2008,  
13 Rinnan et al 2008, Rui et al 2011, Sistla and Schimel 2013, Xu et al 2015, Xue et al 2015, Yu et al 2015,  
14 Zhang et al 2015, Zhou et al 2013) that included changes of soil organic C in different soil layers ( $\geq 2$ )  
15 under warming in the field. The definition of “topsoil” has been ascribed to be either 0-10 cm or 0-20  
16 cm or 0-30 cm soil layers in the literature(Hiederer and Köchy 2011, Jobbagy and Jackson 2000). In this  
17 meta-analysis work, we placed the surface one into the “topsoil” category, while the following one the  
18 “subsoil” category, if a published study had only two soil layers. For those studies that had more than  
19 two soil layers, we considered the top soil layers ( $< 20$  cm) the category of “topsoil”, while the rest of

1 them the category of “subsoil”. We have also slightly varied our choice of soil layers being the “topsoil”  
2 category, and found that it did not change the conclusion that warming had a similar effect on soil C  
3 changes in topsoil and subsoil. To determine the effects of temperature elevation on soil C changes, we  
4 grouped independent observations into two categories: temperature elevations  $\geq 2$  °C and temperature  
5 elevations  $< 2$  °C. We also determined the influences of experimental duration on soil C changes by  
6 grouped observations into two categories: experiments that had been last  $\geq 5$  years and those  $< 5$  years.  
7 We required that the observations included in the meta-analysis model meet the statistical assumption of  
8 independence (Hedges et al 1999). In the current study, measurements of soil C from different soil  
9 layers, precipitation levels, managements, plant species, and ecosystems within a single study were  
10 considered independent observations. For measurements on soil C through time at the same temperature  
11 level, the overall means across different measurement time points were computed and treated as a single  
12 independent observation. Data presented in the figures of published papers were extracted using  
13 Engauge Digitizer (<https://digitizer.sourceforge.net>).

14 Meta-analysis. We assessed data sets using meta-analysis methods described by Hedges et al. (1999)  
15 (Hedges et al 1999). The effect sizes of warming for each individual observation were estimated by  
16 transforming the response ratio ( $R$ ) with the natural log:  $\ln R = (\overline{X}_W / \overline{X}_C)$ , where  $\overline{X}_W$  is the mean for  
17 warming treatment,  $\overline{X}_C$  is the mean for ambient treatment. A mixed model of the meta-analytical  
18 software was employed to calculate the mean effect sizes and 95% confidence intervals (CIs)  
19 (Rosenberg et al 2000). The warming effect on a response variable was deemed statistically significant if

1 the 95% CI did not overlap with 0. Data obtained on the mean effect sizes ( $\overline{\ln R}$ ) and 95% CIs were  
2 unlogged and reported as percentage changes under warming (that is,  $100 \times (|R-1|)$ ).

### 3 **Section 4: the stable isotope probing microcosm experiment**

4 Laboratory incubation. We designed a laboratory microcosm experiment to ascertain the effects of  
5 warming on microbial communities and decomposition. Each field plot was treated as the level of  
6 replication for the laboratory incubation study. Soil from the 20-25 cm soil layer collected from the deep  
7 collar of each plot was split into two 20-g dry mass equivalent aliquots, adjusted to moisture levels of 60%  
8 water holding capacity, and then placed in 165-ml jars. The uniformly (U)  $^{13}\text{C}$ -labeled whole shoot  
9 biomass of *Triticum aestivum* (ground,  $^{13}\text{C}$  abundance > 97%, IsoLife BV, Wageningen, The  
10 Netherlands) were added into one jar with a mass ratio of 150:1 (soil: U- $^{13}\text{C}$  plant material) and then  
11 mixed thoroughly with soil. The other aliquot of soil without the addition of U- $^{13}\text{C}$  plant material was  
12 also subjected to the same mixing process to control for soil disturbance. All soils were incubated at  
13 25 °C in the dark for 9 weeks.

14 Stable isotope probing microcosms. DNA-based stable isotope probing (e.g. DNA-SIP) is a powerful  
15 tool to identify active microorganisms that incorporate specific substrates without the prerequisite of  
16 cultivation (Dumont and Murrell 2005, Friedrich 2006, Radajewski et al 2000). In this study, we used  
17 U- $^{13}\text{C}$  plant material to label the members of microbial communities active in organic matter  
18 decomposition in soils collected from warming and control treatments. The plant material consisted of a  
19 wide range of organic compounds with a range of resistance to microbial attack (that is, from the labile

1 starch to recalcitrant lignin). Soils were incubated for 9 weeks, and this length of incubation time was  
2 reasonable because it allowed for detection of microbial utilization of both labile and recalcitrant organic  
3 compounds while minimizing as much as possible cross-feeding of isotope labelled intermediates of  
4 metabolism produced during the course of the experiment (Dumont and Murrell 2005, Radajewski et al  
5 2000).

6 Gas sampling, measurements and calculations. During the SIP incubations, headspace gas samples were  
7 taken at days 0, 3, 7, 14, 21, 35, 49 and 63. At each sampling point, a 12-ml aliquot of headspace gas  
8 was extracted by a gas-tight syringe from each jar, and then injected into a 12-ml Exetainer evacuated  
9 vial (Labco International Inc., Houston, TX, USA). After each gas sampling, the jars without labeled  
10 plant residue addition were first vented for a while, and then followed by those with residue addition.  
11 Gas samples were analyzed at the stable isotope facility of University of California, Davis. The stable  
12 isotope ratio of  $^{13}\text{C}$  in  $\text{CO}_2$  was determined with a SerCon Cryoprep TGII trace gas concentration system  
13 interfaced to a PDZ Europa 20-20 isotope ratio mass spectrometer (Sercon Ltd., Cheshire, UK).

14 A single isotope, two-source mixing model was used to estimate the proportion of  $\text{CO}_2$  respired from  
15 soil organic matter and  $^{13}\text{C}$ -labelled plant material (Phillips and Gregg 2001). The linear mixing model  
16 was described by the following mass balance equations:

17 
$$\overline{AP}_M = f_R \overline{AP}_R + f_S \overline{AP}_S \quad (13)$$

18 
$$f_R + f_S = 100\% \quad (14)$$

1 where  $f_R$  and  $f_S$  represent the mean proportion of CO<sub>2</sub> respired from residue and soil, respectively, and  
 2  $\overline{AP}_M$ ,  $\overline{AP}_R$  and  $\overline{AP}_S$  denote the mean isotopic signatures ( $AP$  or atom % <sup>13</sup>C, which is equal to the  
 3 fractional abundance of <sup>13</sup>C times 100) for the mixture  $M$  (headspace CO<sub>2</sub>), source  $R$  (residue) and  
 4 source  $S$  (soil). To calculate the mean proportion of source  $S$  in the mixture, equation (2) was rearranged  
 5 and inserted into equation (1) that was further rearranged to solve for  $f_S$ : the mean proportion of source  
 6 soil in the mixture can be calculated as

$$7 \quad f_S = \frac{\overline{AP}_M - \overline{AP}_R}{\overline{AP}_S - \overline{AP}_R} \quad (15)$$

8 The variance for  $f_S$  can be estimated by a first-order Taylor series approximation using partial  
 9 derivatives as:

$$10 \quad \sigma_{f_S}^2 = \frac{1}{(\overline{AP}_S - \overline{AP}_R)^2} [ \sigma_{\overline{AP}_M}^2 + f_S^2 \sigma_{\overline{AP}_S}^2 + (1-f_S)^2 \sigma_{\overline{AP}_R}^2 ] \quad (16)$$

11 where  $\sigma_{\overline{AP}_M}^2$ ,  $\sigma_{\overline{AP}_S}^2$  and  $\sigma_{\overline{AP}_R}^2$  represent variances of the mean isotopic signatures for the mixture  $M$ , and  
 12 source  $S$  and  $R$ , respectively. Using the equation (4), we considered the variability of isotopic signatures  
 13 of both sources and mixture in estimating the variance of  $f_S$ .

14 Soil DNA extraction. Upon the completion of laboratory incubations, soil samples were immediately  
 15 stored in a freezer at -80 °C. Genomic DNA was extracted from 5-g aliquots of soil samples using the  
 16 PowerMax Soil DNA Isolation Kit (MO BIO Laboratories, Inc., Carlsbad, CA, USA). DNA quality was  
 17 quantified by the ratios of 260/280 nm and 260/230 nm using the NanoDrop (ND-100

1 Spectrophotometer, Thermo Fisher Scientific Inc., Wilmington, DE, USA), and the DNA concentrations  
2 were determined using the Quant-iT PicoGreen dsDNA Assay Kit (Molecular Probes, Inc., Eugene, OR,  
3 USA) with FLUOstar Optima microplate reader (BMG Labtech Inc., Cary, NC, USA).

4 *<sup>13</sup>C-DNA separation.* We separated <sup>13</sup>C-labelled DNA from unlabelled community DNA using the  
5 gradient fractionation method described by Neufeld and colleagues (Neufeld et al 2007). Briefly, 3 µg  
6 genomic DNA was mixed with gradient buffer (0.1 M tris, 0.1 M KCl AND 1 Mm EDTA) in 1-ml  
7 aliquots. The mixture of DNA/gradient buffer was then combined with CsCl solution (1.870 g ml<sup>-1</sup>) and  
8 loaded in a polyallomer bell-top Quick-Seal centrifuge tube (Beckman Coulter Inc., Fullerton, CA).  
9 Centrifuge tubes were sealed and spun in a Vti-65 rotor in an Optima LE-80k ultracentrifuge (Beckman  
10 Coutler) at 44,100 rpm and 20 °C for 40 h. Gradients were fractionated using the Beckman Fraction  
11 Recovery System (Beckman Coutler) in connection with a syringe pump (model R-100E, Razel,  
12 Georgia, VT). The buoyant density of gradient fractions was determined using a refractometer (AR200,  
13 Reichert, Depew, NY). DNA from gradient fractions was precipitated with isopropanol for 2 h at 25 °C  
14 and then resuspended in sterilized nuclease-free H<sub>2</sub>O.

## 15 **16S rRNA gene sequencing**

16 *Amplification and pyrosequencing of targeted 16S gene.* We amplified 16S rRNA genes of each sample  
17 by targeting the V4-V8 hypervariable regions of *Escherichia coli* 16S rRNA genes (positions 515-1391).  
18 The forward primer (NNNNNNNNTCGTGCCAGCMGCCGCGG) contained a unique 8-nt  
19 error-correcting barcode to tag each PCR product as designated by “NNNNNNNN”, a “TC” linker

1 sequence and the primer 515F. The reverse primer (NNNNNNNNNCAGACGGGCGGTGTGTRCA)  
2 contained a unique 8-nt barcode ‘NNNNNNNN’, a “CA” linker sequence and the primer 1391R. Each  
3 biological sample (field replicate) was amplified with 3 tagged primers as 3 technical replicates. Each  
4 100- $\mu$ l PCR reaction consisted of 3 Units of AccuPrime Tag DNA polymerase (Invitrogen, Carlsband,  
5 CA), 10  $\mu$ l supplied 10 $\times$  PCR buffer, 10  $\mu$ l supplied 50 mM MgSO<sub>4</sub>, 8  $\mu$ l 2.5 mM dNTP (Invitrogen),  
6 0.5  $\mu$ l BSA (New England BioLabs, Ipswich, MA), 0.2  $\mu$ M forward and 0.2  $\mu$ M reverse primers, and 5  
7 ng template genomic DNA. The thermocycling conditions were as follows: initial denaturation at 94 °C  
8 for 2 min, 25 cycles of 94 °C for 30 s, 56 °C for 30 s, 68 °C for 45 s and a final extension at 68 °C for 10  
9 min. To ameliorate PCR amplification biases and get enough PCR products for sequencing, three 100- $\mu$ l  
10 reactions were performed for each technical sample. The PCR products of each technical sample were  
11 pooled and purified by agarose (1.0%) gel electrophoresis. The amplified PCR products were then  
12 recovered using the QIAquick Gel Extraction Kit (QIAGEN) and quantified using Quant-iT PicoGreen  
13 dsDNA Assay Kit with the FLUOstar OPTIMA (BMG LABTECH, Aylesbury, UK). All samples were  
14 mixed in an equimolar concentration prior to emulsion PCR for 454 sequencing. Pyrosequencing was  
15 carried out on a 454 Life Sciences Genome Sequencer FLX titanium instrument (454 Life Sciences,  
16 Brandford, CT).

17 Pyrosequencing data preprocessing. The pyrosequencing flowgrams were converted to sequence reads  
18 using Roche GS FLX software (version 2.5.3). Both forward and reverse sequencing reads were  
19 recovered with an average length of ~450 bp. Reads trimming and downstream analyses were performed  
20 using QIIME (Caporaso et al 2010b). Briefly, we trimmed reads at an accuracy threshold of 0.5% per

1 base error probability (Huse et al 2007) and then removed bar codes and primers and assigned sequences  
2 to samples by examining the 8-nt barcode. Reads were removed if they did not match exactly to a bar  
3 code and primer, were less than 200 nt and contained any unresolved nucleotides (N's). All sequences  
4 were aligned using the Python Nearest Alignment Space Termination (PyNAST) algorithm (Caporaso et  
5 al 2010a). Chimeric sequences were removed from the alignment using QIIME's ChimeraSlayer  
6 wrapper. Sequences were then assigned to a taxonomy using the RDP Classifier program with a  
7 confidence cutoff of 0.8 (Wang et al 2007). The operational taxonomic units (OTUs) were defined at 97%  
8 identity (Stackebrandt and Goebel 1994). The resulting OTU tables were used for further phylogenetic  
9 and statistical analyses.

## 10 **GeoChip analysis**

11 Labelling, hybridization and imaging. We labelled purified DNA with Cy-3 using random primers and  
12 Klenow fragment of DNA polymerase I. Labelled DNA was purified and dried at 45 °C for 45 min. We  
13 then rehydrated the dried DNA with 2.68 µl sample tracking control (NimbleGen) and incubated at 50°C  
14 for 5 min. In each labelled DNA sample, we added 7.32 µl hybridization buffer containing a mixture of  
15 4 µl formamide, 2.5 µl 20X SSC, 0.1 µl SDS(10%), 0.28 µl Cy3-labelled alignment oligo, 0.24 µl  
16 Cy5-labelled CORS target and 0.2 µl universal standard. Samples were then incubated at 95 °C for 5  
17 min and maintained at 45 °C. Finally, samples was loaded onto the microarray placed with an HX12  
18 mixer (Roche NimbleGen, Madison, WI, USA) and hybridized at 42 °C with 40% formamide for 16 h  
19 on a hybridization station (MAUI, BioMicro Systems, Salt Lake City, UT, USA). After hybridization,



1 the microarray was scanned at full laser power and 100% photomultiplier tubes gain using a NimbleGen  
2 MS 200 Microarray Scanner (Roche NimbleGen).

3 Data preprocessing. We obtained the signal intensity of each probe by gridding scanned images using  
4 the gridding file containing GeoChip 4 probes and NimbleGen control probes (NimbleScan Software,  
5 Roche NimbleGen). Probe spots with coefficient of variance larger than 0.8 were not included in the  
6 downstream analysis. We removed spots that with a signal to noise ratio (SNR) less than 2.0, and then  
7 performed normalization of signal intensities for each probe using methods previously described (Tu et  
8 al 2014, Zhou et al 2012). All data were further analyzed using the GeoChip 4 pipeline at the website  
9 <http://ieg.ou.edu/microarray/>.

10

## 11 **Cited Literature**

12 Arrhenius S (1889). Uber die reaktionsgeschwindigkeit bei der inversion von rohrzucker durch sauren. *Zeitschrift*  
13 *für Physikalische Chemie* **4**: 226-248.

14

15 Caporaso JG, Bittinger K, Bushman FD, DeSantis TZ, Andersen GL, Knight R (2010a). PyNAST: a flexible tool  
16 for aligning sequences to a template alignment. *Bioinformatics* **26**: 266-267.

17

18 Caporaso JG, Kuczynski J, Stombaugh J, Bittinger K, Bushman FD, Costello EK *et al* (2010b). QIIME allows  
19 analysis of high-throughput community sequencing data. *Nat Methods* **7**: 335-336.

20

21 Currie LA (2004). The remarkable metrological history of radiocarbon dating II. *Journal of Research of the*  
22 *National Institute of Standards and Technology* **109**: 185-217.

23

1 Davidson EA, Janssens IA (2006). Temperature sensitivity of soil carbon decomposition and feedbacks to climate  
2 change. *Nature* **440**: 165-173.

3

4 Davidson EA, Samanta S, Caramori SS, Savage K (2012). The Dual Arrhenius and Michaelis-Menten kinetics  
5 model for decomposition of soil organic matter at hourly to seasonal time scales. *Global Change Biol* **18**:  
6 371-384.

7

8 Donahue DJ (1995). Radiocarbon analysis by accelerator mass spectrometry. *International Journal of Mass*  
9 *Spectrometry and Ion Processes* **143**: 235-245.

10

11 Dumont MG, Murrell JC (2005). Stable isotope probing-linking microbial identity to function. *Nat Rev Micro* **3**:  
12 499-504.

13

14 Friedrich MW (2006). Stable-isotope probing of DNA: insights into the function of uncultivated microorganisms  
15 from isotopically labeled metagenomes. *Curr Opin Biotechnol* **17**: 59-66.

16

17 He N, Chen Q, Han X, Yu G, Li L (2012). Warming and increased precipitation individually influence soil carbon  
18 sequestration of Inner Mongolian grasslands, China. *Agriculture Ecosystems & Environment* **158**: 184-191.

19

20 Hedges LV, Gurevitch J, Curtis PS (1999). The meta-analysis of response ratios in experimental ecology. *Ecology*  
21 **80**: 1150-1156.

22

23 Heng T, Wu J, Xie S, Wu M (2011). The responses of soil C and N, microbial biomass C or N under alpine  
24 meadow of Qinghai-Tibet Plateau to the change of temperature and precipitation. *Chinese Agricultural Science*  
25 *Bulletin* **03**: 425-430.

26

27 Hiederer R, Köchy M (2011). *Global Soil Organic Carbon Estimates and the Harmonized World Soil Database*.  
28 EUR 25225 EN. Publications Office of the European Union.

29

30 Huse SM, Huber JA, Morrison HG, Sogin ML, Mark Welch D (2007). Accuracy and quality of massively parallel  
31 DNA pyrosequencing. *Genome Biology* **8**.

32

1 Jenkinson DS, Poulton PR, Bryant C (2008). The turnover of organic carbon in subsoils. Part 1. Natural and bomb  
2 radiocarbon in soil profiles from the Rothamsted long-term field experiments. *Eur J Soil Sci* **59**: 391-399.

3

4 Jobbagy EG, Jackson RB (2000). The vertical distribution of soil organic carbon and its relation to climate and  
5 vegetation. *Ecol Appl* **10**: 423-436.

6

7 Knorr W, Prentice IC, House JI, Holland EA (2005). Long-term sensitivity of soil carbon turnover to warming.  
8 *Nature* **433**: 298-301.

9

10 Levin I, Kromer B, Schoch-Fischer H, Bruns M, Münnich M, Berdau D *et al* (1994).  $\delta^{14}\text{CO}_2$  record from  
11 Vermont. . *Trends: A Compendium of Data on Global Change*. Carbon Dioxide Information Analysis Center, Oak  
12 Ridge National Laboratory, U.S. Department of Energy, Oak Ridge, Tenn., U.S.A.

13

14 Li N, Wang G, Gao Y, Wang J, Liu La (2010). Effects of simulated warming on soil nutrients and biological  
15 characteristics of alpine meadow soil in the headwaters region of the Yangtze River. *Acta Pedologica Sinica* **47**:  
16 1214-1224.

17

18 Li N, Wang G, Yang Y, Gao Y, Liu G (2011). Plant production, and carbon and nitrogen source pools, are  
19 strongly intensified by experimental warming in alpine ecosystems in the Qinghai-Tibet Plateau. *Soil Biol*  
20 *Biochem* **43**: 942-953.

21

22 Luo YQ, Wan SQ, Hui DF, Wallace LL (2001). Acclimatization of soil respiration to warming in a tall grass  
23 prairie. *Nature* **413**: 622-625.

24

25 Neufeld JD, Vohra J, Dumont MG, Lueders T, Manefield M, Friedrich MW *et al* (2007). DNA stable-isotope  
26 probing. *Nat Protocols* **2**: 860-866.

27

28 Niu S, Sherry RA, Zhou X, Wan S, Luo Y (2010). Nitrogen regulation of the climate-carbon feedback: evidence  
29 from a long-term global change experiment. *Ecology* **91**: 3261-3273.

30

31 Pan X-l, Lin B, Liu Q (2008). Effects of elevated temperature on soil organic carbon and soil respiration under  
32 subalpine coniferous forest in western Sichuan Province, China. *The Journal of Applied Ecology* **19**: 1637-1643.

33

- 1 Phillips DL, Gregg JW (2001). Uncertainty in source partitioning using stable isotopes. *Oecologia* **127**: 171-179.
- 2
- 3 Radajewski S, Ineson P, Parekh NR, Murrell JC (2000). Stable-isotope probing as a tool in microbial ecology.  
4 *Nature* **403**: 646-649.
- 5
- 6 Rinnan R, Michelsen A, Jonasson S (2008). Effects of litter addition and warming on soil carbon, nutrient pools  
7 and microbial communities in a subarctic heath ecosystem. *Applied Soil Ecology* **39**: 271-281.
- 8
- 9 Rosenberg MS, Adams DC, Gurevitch J (2000). *MetaWin. Statistical software for meta-analysis. Version 2.0.*  
10 Sinauer Associates: Sunderland, Massachusetts.
- 11
- 12 Rui Y, Wang S, Xu Z, Wang Y, Chen C, Zhou X *et al* (2011). Warming and grazing affect soil labile carbon and  
13 nitrogen pools differently in an alpine meadow of the Qinghai-Tibet Plateau in China. *J Soils Sed* **11**: 903-914.
- 14
- 15 Rumpel C, Kogel-Knabner I, Bruhn F (2002). Vertical distribution, age, and chemical composition of organic,  
16 carbon in two forest soils of different pedogenesis. *Org Geochem* **33**: 1131-1142.
- 17
- 18 Schaedel C, Luo Y, Evans RD, Fei S, Schaeffer SM (2013). Separating soil CO<sub>2</sub> efflux into C-pool-specific decay  
19 rates via inverse analysis of soil incubation data. *Oecologia* **171**: 721-732.
- 20
- 21 Sistla SA, Schimel JP (2013). Seasonal patterns of microbial extracellular enzyme activities in an arctic tundra  
22 soil: Identifying direct and indirect effects of long-term summer warming. *Soil Biol Biochem* **66**: 119-129.
- 23
- 24 Stackebrandt E, Goebel BM (1994). Taxonomic Note: A place for DNA-DNA reassociation and 16s  
25 ribosome-RNA sequence analysis in the present species definition in bacteriology. *Int J Syst Bacteriol* **44**:  
26 846-849.
- 27
- 28 Torn MS, Swanston CW, Castanha C, Trumbore SE (2009). *Storage and Turnover of Organic Matter in Soil.*  
29 John Wiley & Sons, Inc.
- 30
- 31 Tu Q, Yu H, He Z, Deng Y, Wu L, Van Nostrand JD *et al* (2014). GeoChip 4: a functional gene-array-based  
32 high-throughput environmental technology for microbial community analysis. *Molecular Ecology Resources* **14**:  
33 914-928.

1  
2 Wang Q, Garrity GM, Tiedje JM, Cole JR (2007). Naive Bayesian classifier for rapid assignment of rRNA  
3 sequences into the new bacterial taxonomy. *Appl Environ Microbiol* **73**: 5261-5267.

4  
5 Xu X, Shi Z, Li D, Zhou X, Sherry RA, Luo Y (2015). Plant community structure regulates responses of prairie  
6 soil respiration to decadal experimental warming. *Global Change Biol*: 10.1111/gcb.12940.

7  
8 Xue X, Peng F, You Q, Xu M, Dong S (2015). Belowground carbon responses to experimental warming regulated  
9 by soil moisture change in an alpine ecosystem of the Qinghai-Tibet Plateau. *Ecology and Evolution* **5**:  
10 4063-4078.

11  
12 Yu X, Yao B, Zhou H, Jin Y, Yang Y, Wang W *et al* (2015). Variable responses to long-term simulated warming  
13 of underground biomass and carbon allocations of two alpine meadows on the Qinghai-Tibet Plateau. *Chin Sci*  
14 *Bull* **60**: 379-388.

15  
16 Zhang B, Chen SY, Zhang JF, He XY, Liu WJ, Zhao Q *et al* (2015). Depth-related responses of soil microbial  
17 communities to experimental warming in an alpine meadow on the Qinghai-Tibet Plateau. *Eur J Soil Sci* **66**:  
18 496-504.

19  
20 Zhou J, Xue K, Xie J, Deng Y, Wu L, Cheng X *et al* (2012). Microbial mediation of carbon-cycle feedbacks to  
21 climate warming. *Nature Climate Change* **2**: 106-110.

22  
23 Zhou X, Wan SQ, Luo YQ (2007). Source components and interannual variability of soil CO<sub>2</sub> efflux under  
24 experimental warming and clipping in a grassland ecosystem. *Global Change Biol* **13**: 761-775.

25  
26 Zhou XQ, Chen CR, Wang YF, Smaill S, Clinton P (2013). Warming Rather Than Increased Precipitation  
27 Increases Soil Recalcitrant Organic Carbon in a Semiarid Grassland after 6 Years of Treatments. *PLoS ONE* **8**:  
28 e53761.

29  
30  
31
